# Supplementary material
Source: Research Square preprint supplement (doi:10.21203/rs.3.rs-8811543/v1)
Supplement: Supplementary file 1 [file d941f3a038a8386c97813ed6.docx]

**Supporting Information**

**Semi-Reversible Thermochromism in Polydiacetylene–PDMS Hybrid Structures**

Inwoong Heo1†, Seung Soo Shin1†, Binglun Tu1†, Boyoung Yoon1, Jong-Man Kim2*, and Bum Jun Park1*

1Department of Chemical Engineering (BK21 FOUR Integrated Engineering Program), Kyung Hee University, Yongin 17104, South Korea.

2Department of Chemical Engineering, Hanyang University, Seoul 04763, South Korea.

†These authors contributed equally to this work.

*Corresponding authors.

E-mail addresses: jmk@hanyang.ac.kr (J.-M. Kim), bjpark@khu.ac.kr (B. J. Park)


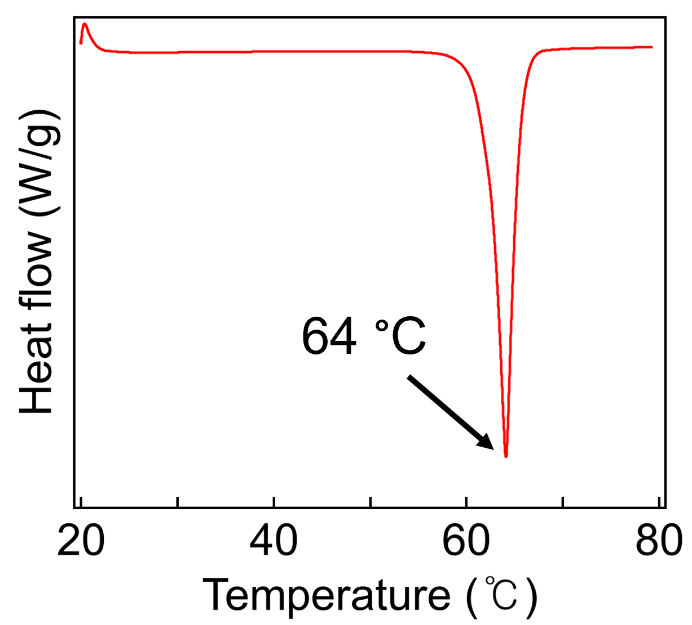


**Fig. S1.** Thermal analysis of 10,12-pentacosadiynoic acid (PCDA) showing an endothermic melting transition near ~64 °C.


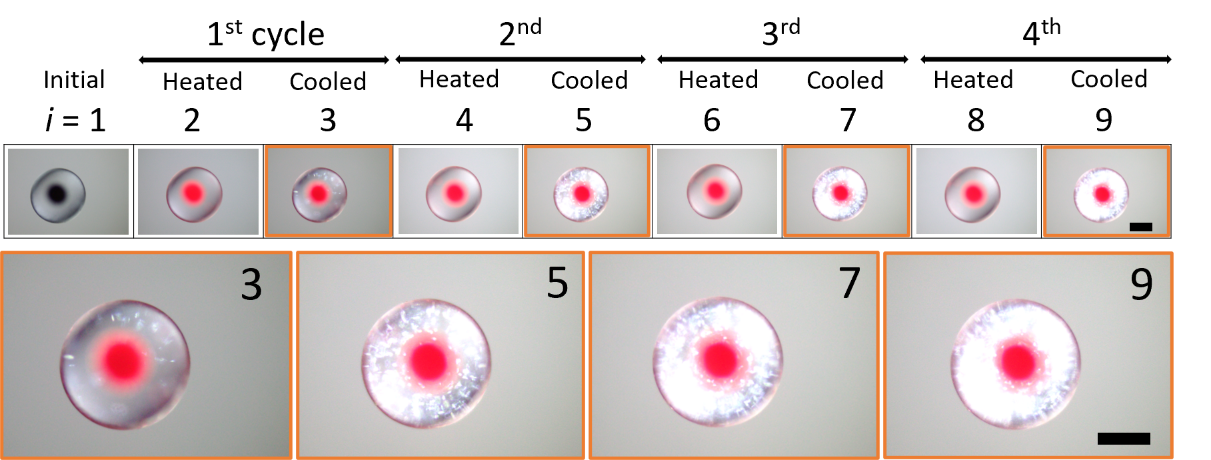


**Fig. S2.** Magnified polarized-microscope images corresponding to Fig. 5b at 120 °C, shown for steps 3, 5, 7, and 9. After heating and subsequent cooling, bright regions emerge within the PDMS shell, consistent with crystallization or self-assembly of PCDA that migrated into the PDMS matrix during thermal treatment. All scale bars are 200 µm.


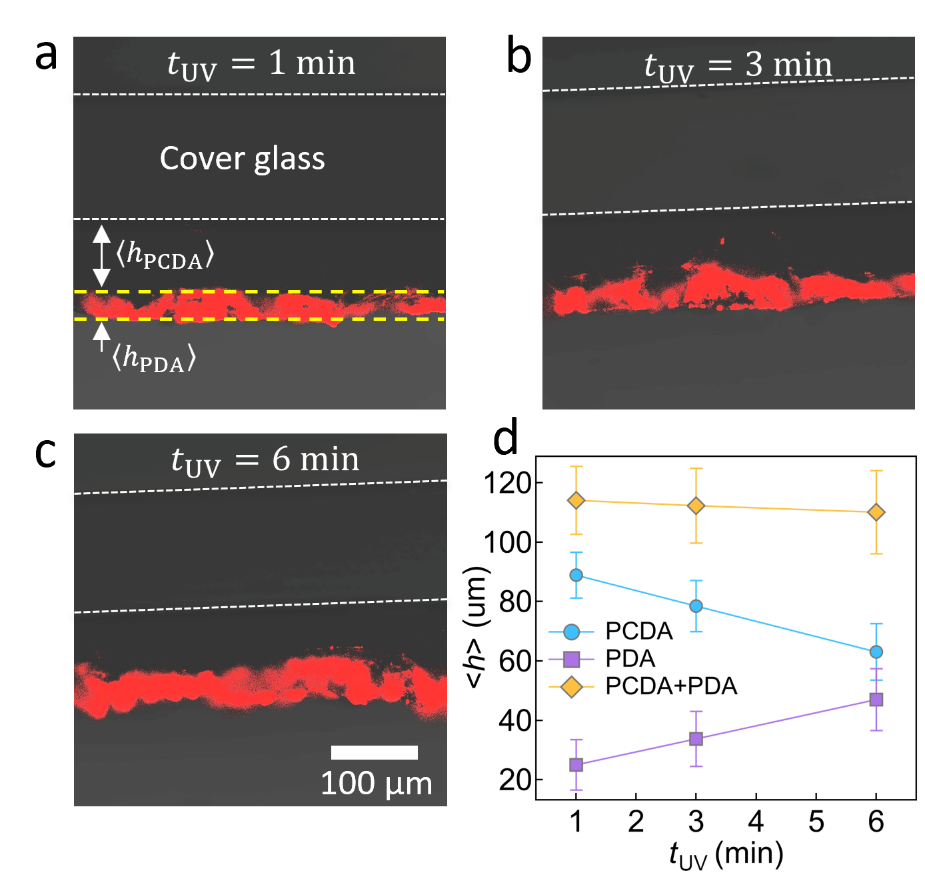


**Fig. S3.** Effect of UV polymerization time on the thickness of PDA and PCDA layers. (a–c) Cross-sectional confocal images of PCDA/PDA films polymerized for 1 (a), 3 (b), and 6 min (c), showing the red-emissive PDA layer and the non-fluorescent PCDA layer. White dashed lines indicate the boundaries of the cover glass, and yellow dashed lines denote the guideline for the PDA layer. (d) Average thicknesses of the PDA layer (), PCDA layer (), and the total film as a function of . Error bars represent standard deviations from measurements at ten positions per sample.
